# Supplementary material for: Colloidal synthesis of emission-tunable Cu-doped Zn–In–Se/ZnSe core/shell nanocrystals for lighting and bioimaging applications
Source: Royal Society of Chemistry journal article supplement (doi:10.1039/d4lf00132j), 2024-01-01
Supplement: d4lf00132j1.pdf [file d4lf00132j1.pdf]

## Electronic Supporting Information

### Colloidal synthesis of emission tunable Cu-doped Zn-In-Se/ZnSe core/shell nanocrystals toward lighting and bioimaging applications

Joicy Selvaraj,<sup>1</sup> Arun Mahesh,<sup>2</sup> Vaseeharan Baskaralingam,<sup>3</sup> Arunkumar Dhayalan<sup>2</sup>, Miguel  
Ángel Gracia Pinilla,<sup>4</sup> Saravanan Rajendran<sup>4</sup>, and Thangadurai Paramasivam<sup>1,\*</sup>

1. Centre for Nanoscience and Technology, Pondicherry University, Puducherry - 605 014, India.

2. Department of Biotechnology, Pondicherry University, Puducherry - 605 014, India.

3. Department of Animal Health and Management, Alagappa University, Karaikudi – 630 003, Tamil  
Nadu, India.

4. Faculty of Engineering, Department of Mechanical Engineering, University of Tarapacá, Avda,  
General Velasquez, 1775, Arica, Chile

\*thangaduraip.nst@pondiuni.edu.in / thangadurai.p@gmail.com

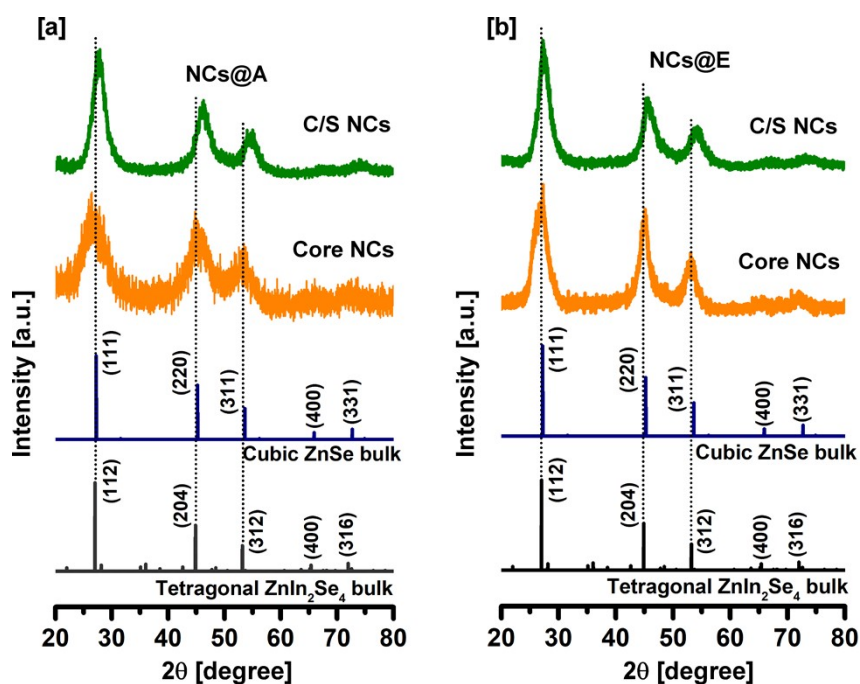

**Figure S1.** Comparative X-ray diffraction patterns of  $\text{Cu}^{\text{I}}$ :Zn-In-Se with the heavily doped and undoped core NCs along with their resulting C/S NCs after three batches of Zn-precursor injection. (a) NCs@A (Pristine, undoped) and (b) NCs@E (Cu-doped, 0.08 mmol of dopant concentration)

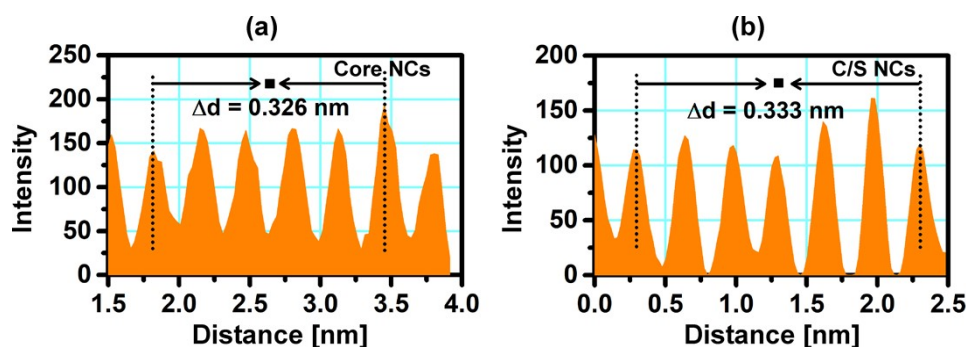

**Figure S2.** The intensity line profiles of lattice fringes obtained for (a)  $\text{Cu}^{\text{I}}$  doped Zn-In-Se alloy core NCs along the green line marked in Fig. S2b of main content and (b)  $\text{Cu}^{\text{I}}$ :Zn-In-Se/ZnSe C/S NCs along the green line marked in Fig. S2f of main content.

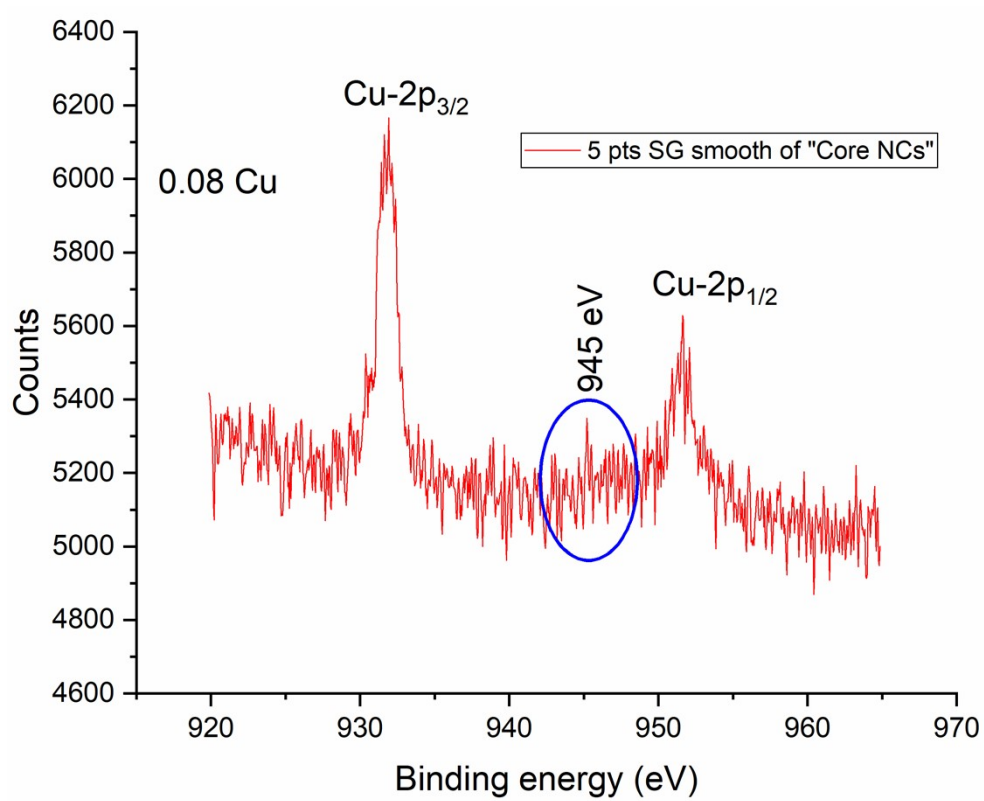

Figure S3. XPS spectra of core NC with 0.08 Cu doping.

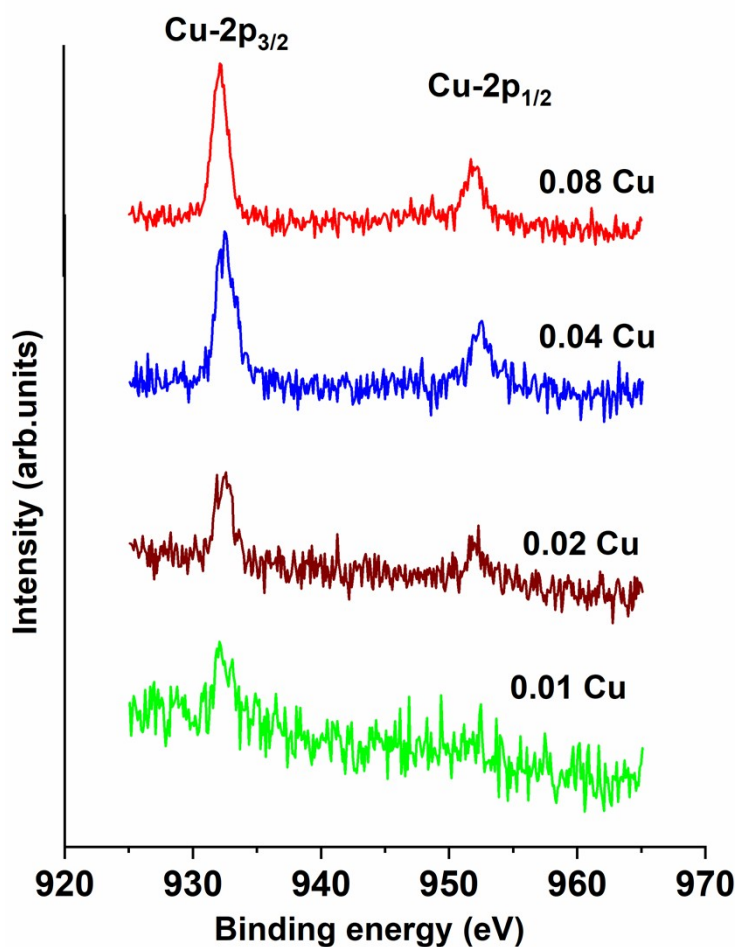

**Figure S4.** Cu-2*p* XPS spectra of Cu<sup>I</sup>:Zn-In-Se core NCs.

Table T1: Quantification results obtained from XPS data for the core QDs with different Cu content.

**0.01 mmol Cu**

| Name  | Peak BE | Area (P) CPS.eV | Atomic % |
|-------|---------|-----------------|----------|
| Se 3d | 56.07   | 239509.62       | 72.21    |
| In 3d | 445.29  | 591778.54       | 12.90    |
| Cu 2p | 932.83  | 101141.56       | 2.15     |
| Zn 2p | 1022.17 | 365539.33       | 12.74    |

**0.02 mmol Cu**

| Name  | Peak BE | Area (P) CPS.eV | Atomic % |
|-------|---------|-----------------|----------|
| Se 3d | 55.24   | 306957.6        | 63.73    |
| In 3d | 445.33  | 1115213.49      | 14.68    |
| Cu 2p | 932.86  | 149187.95       | 3.8      |
| Zn 2p | 1022.29 | 740670.27       | 17.78    |

#### 0.04 mmol Cu

| Name  | Peak BE | Area (P) CPS.eV | Atomic % |
|-------|---------|-----------------|----------|
| Se 3d | 55.26   | 377815.42       | 62.62    |
| In 3d | 445.19  | 1377678.03      | 14.48    |
| Cu 2p | 932.27  | 210919.8        | 4.29     |
| Zn 2p | 1022.16 | 971346.34       | 18.61    |

#### 0.08 mmol Cu

| Name  | Peak BE | Area (P) CPS.eV | Atomic % |
|-------|---------|-----------------|----------|
| Se 3d | 55.46   | 279744.44       | 62.75    |
| In 3d | 445.73  | 895627.87       | 12.74    |
| Cu 2p | 953.04  | 214632.91       | 6.07     |
| Zn 2p | 1022.34 | 711025.96       | 18.44    |

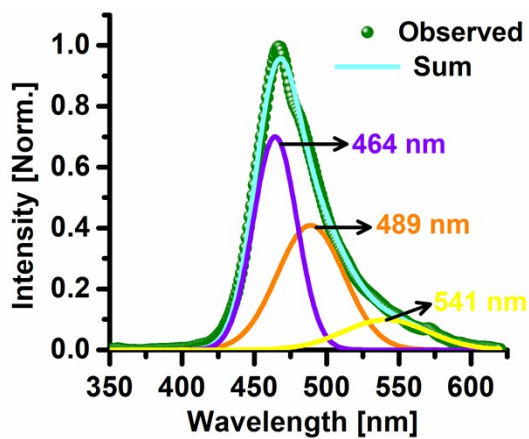

**Figure S5.** Deconvoluted fluorescence spectrum of pristine Zn-In-Se alloy core NCs excited at the wavelength of 320 nm.

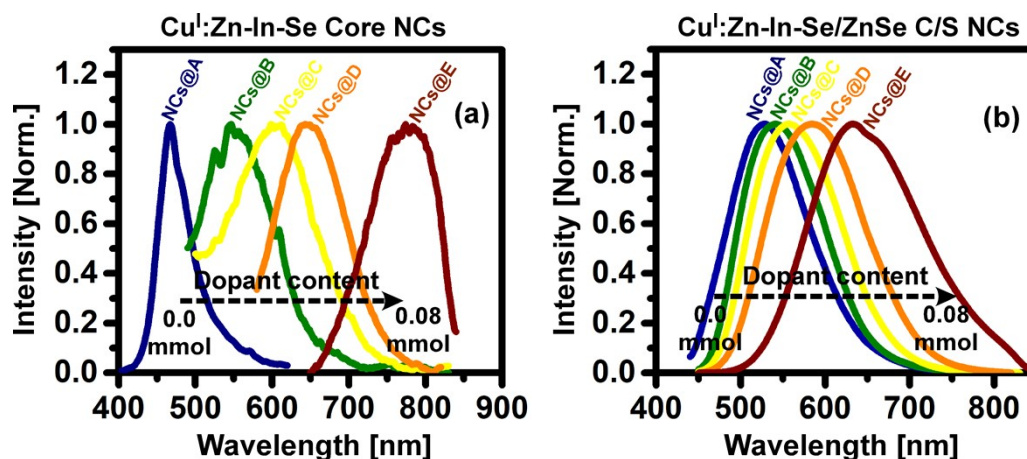

**Figure S6.** The normalized emission spectra of (a) Cu<sup>I</sup>:Zn-In-Se core NCs and (b) Cu<sup>I</sup>:Zn-In-Se/ZnSe C/S NCs (Batch 3) with various Cu dopant concentration in the core NCs.

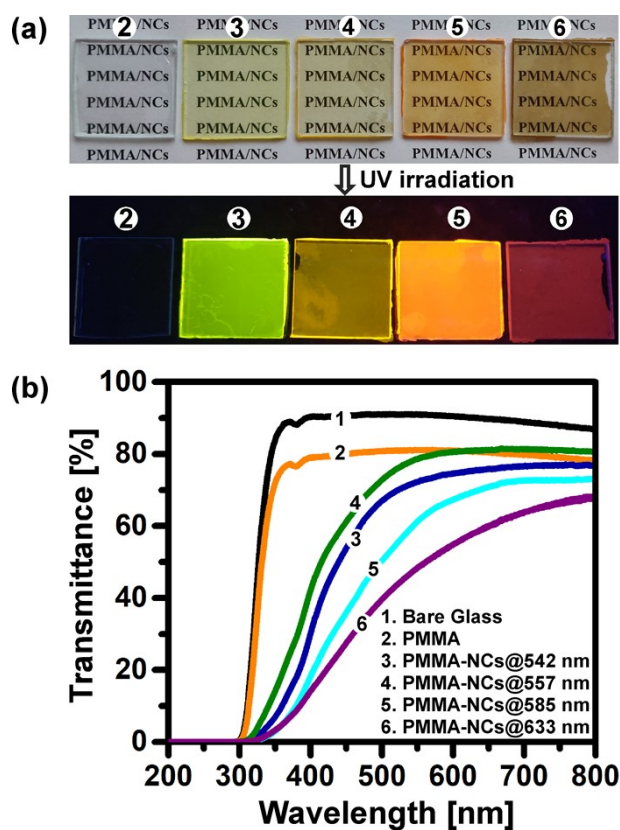

**Figure S7.** (a) Digital photographs of PMMA-NCs composite films coated on the glass slides excited under ambient light and UV light. (b) A series of optical transmittance spectra of PMMA-NCs composite films with various emission colors on the glass substrate. The numbers marked in (a) and (b) represent that they are from the same sample.

**Table T2.** The PL parameters of the color-tunable Cu<sup>I</sup>:Zn-In-Se/ZnSe NCs before (NCs solution) and after embedding with the PMMA, the PMMA-NCs composite film.

| Sample Code | Emission maximum (nm) |                         | Emission linewidth (nm) |                         |
|-------------|-----------------------|-------------------------|-------------------------|-------------------------|
|             | NCs solution          | PMMA-NCs composite film | NCs solution            | PMMA-NCs composite film |
| NCs@542nm   | 542                   | 544                     | 93.3                    | 97.0                    |
| NCs@557nm   | 557                   | 569                     | 101.8                   | 106.4                   |
| NCs@585nm   | 585                   | 618                     | 111.7                   | 115.7                   |
| NCs@633nm   | 633                   | 703                     | 146.0                   | 170.5                   |

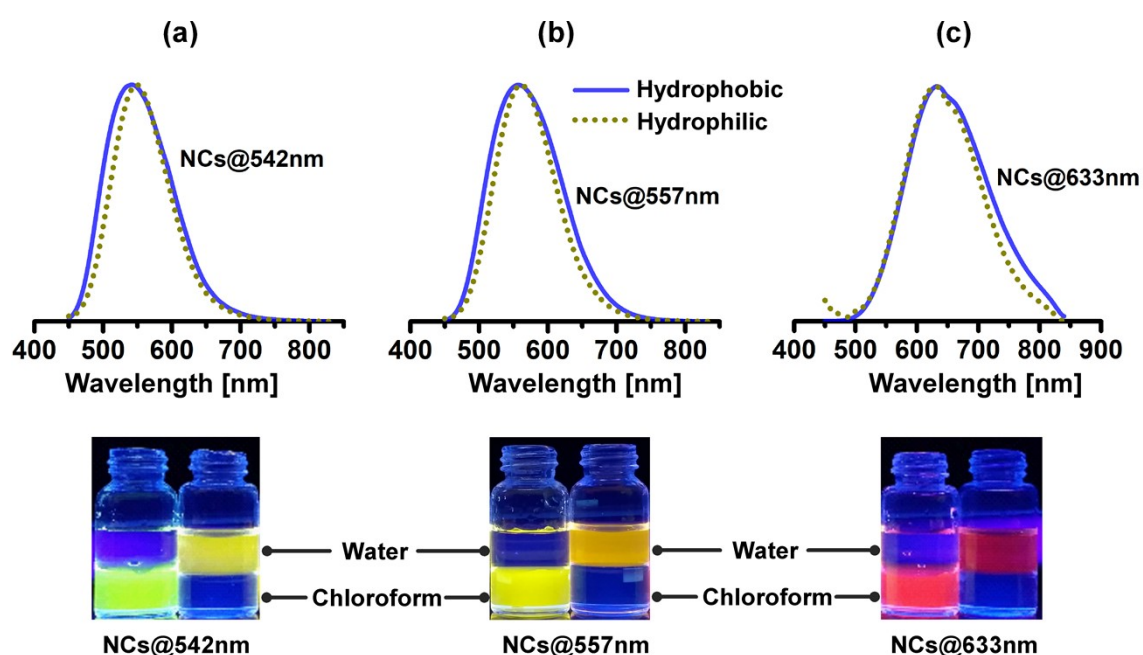

**Figure S8.** Normalized fluorescence intensity spectra of Cu<sup>I</sup>:Zn-In-Se/ZnSe C/S NCs before (OLA coated) and after (11-MUA coated) ligand exchange. **(a)** NCs@542nm, **(b)** NCs@557nm and **(c)** NCs@633nm. The visual comparison of NCs before and after ligand exchange is shown in digital photographs acquired under UV excitation, below the emission spectrum.

### Fitting and Calculations of Fluorescence Decay Curves:

The fluorescence decay curves were fitted by the tri-exponential function;

$$I(t) = \alpha_1 e^{-t/\tau_1} + \alpha_2 e^{-t/\tau_2} + \alpha_3 e^{-t/\tau_3} \quad (\text{SE1})$$

where  $t$  represents time,  $\tau_1$ ,  $\tau_2$  and  $\tau_3$  are florescence decay times,  $\alpha_1$ ,  $\alpha_2$  and  $\alpha_3$  are the corresponding decay amplitudes fraction.

The amplitude weighted average lifetimes were calculated using the following equation

$$\langle \tau_{\text{avg}} \rangle = \frac{\alpha_1 \tau_1^2 + \alpha_2 \tau_2^2 + \alpha_3 \tau_3^2}{\alpha_1 \tau_1 + \alpha_2 \tau_2 + \alpha_3 \tau_3} = f_1 \tau_1 + f_2 \tau_2 + f_3 \tau_3 \quad (\text{SE2})$$

The fractional intensities ( $f_1$ ,  $f_2$  and  $f_3$ ) give the weight of each recombination path and defined as

$$f_{1(2,3)} = \frac{\alpha_{1(2,3)} \tau_{1(2,3)}}{\alpha_1 \tau_1 + \alpha_2 \tau_2 + \alpha_3 \tau_3} \quad (\text{SE3})$$
